# Supplementary material for: Liquid phase epitaxy of CuGaO2 on GaN: P–N heterostructure for photocatalytic water splitting
Source: Royal Society of Chemistry journal article supplement (doi:10.1039/d3ya00226h), 2023-01-01
Supplement: d3ya00226h1.pdf [file d3ya00226h1.pdf]

**Supplementary Information**

**Liquid Phase Epitaxy of CuGaO<sub>2</sub> on GaN: P-N  
Heterostructure for Photocatalytic Water Splitting**

Hadi Sena<sup>1,2\*</sup>, Sho Kitano<sup>3</sup>, Hiroki Habazaki<sup>3</sup>, Masayoshi Fuji<sup>1,2</sup>

<sup>1</sup>Advanced Ceramic Research Center, Nagoya Institute of Technology, Tajimi 507-0033, Japan

<sup>2</sup>Department of Life Science and Applied Chemistry, Nagoya Institute of Technology, Tajimi 507-0071, Japan

<sup>3</sup>Division of Applied Chemistry, Faculty of Engineering, Hokkaido University, 060-8628 Japan

**Corresponding Author**

[\\*sena.hadi@nitech.ac.jp](mailto:sena.hadi@nitech.ac.jp)

## **Contents**

**Figure S1. A schematic illustration of the photocatalytic experiment setup.**

**Figure S2. Atomic force microscopy image of the CuGaO<sub>2</sub> film on GaN substrate in the scan area of 2 μm x 2 μm.**

**Figure S3. XRD profile of the CuGaO<sub>2</sub> film on GaN substrate. The intensity is in the log scale.**

**Figure S4. XRD profile of the powder synthesized inside the crucible.**

**Figure S5. SEM micrographs of the powder synthesized inside the crucible.**

**Figure S6. XRD profile of the CuGaO<sub>2</sub> film on GaN substrate after photocatalytic test for confirming the stability of the photocatalyst.**

**Figure S7. SEM micrograph of Pt cocatalyst nanoparticles on the surface of CuGaO<sub>2</sub> film on GaN substrate.**

**Figure S8. XRD profile of the hydrothermally synthesized CuGaO<sub>2</sub>.**

**Figure S9. Photocatalytic hydrogen generation of the hydrothermally synthesized CuGaO<sub>2</sub>.**

**Experimental procedure of CuGaO<sub>2</sub> synthesized by a hydrothermal method.**

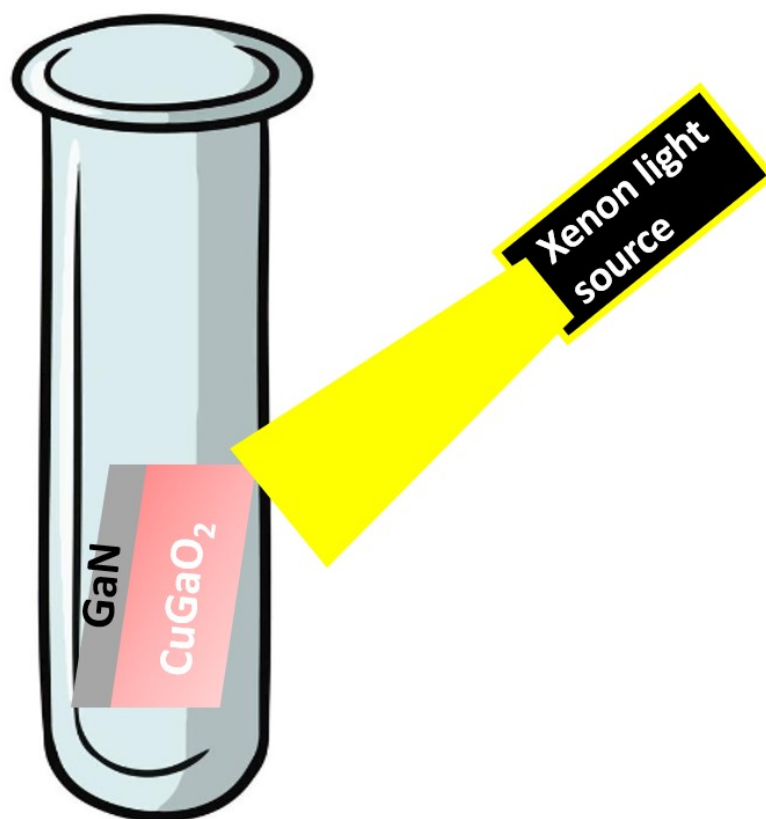

Figure S1. A schematic illustration of the photocatalytic experiment setup.

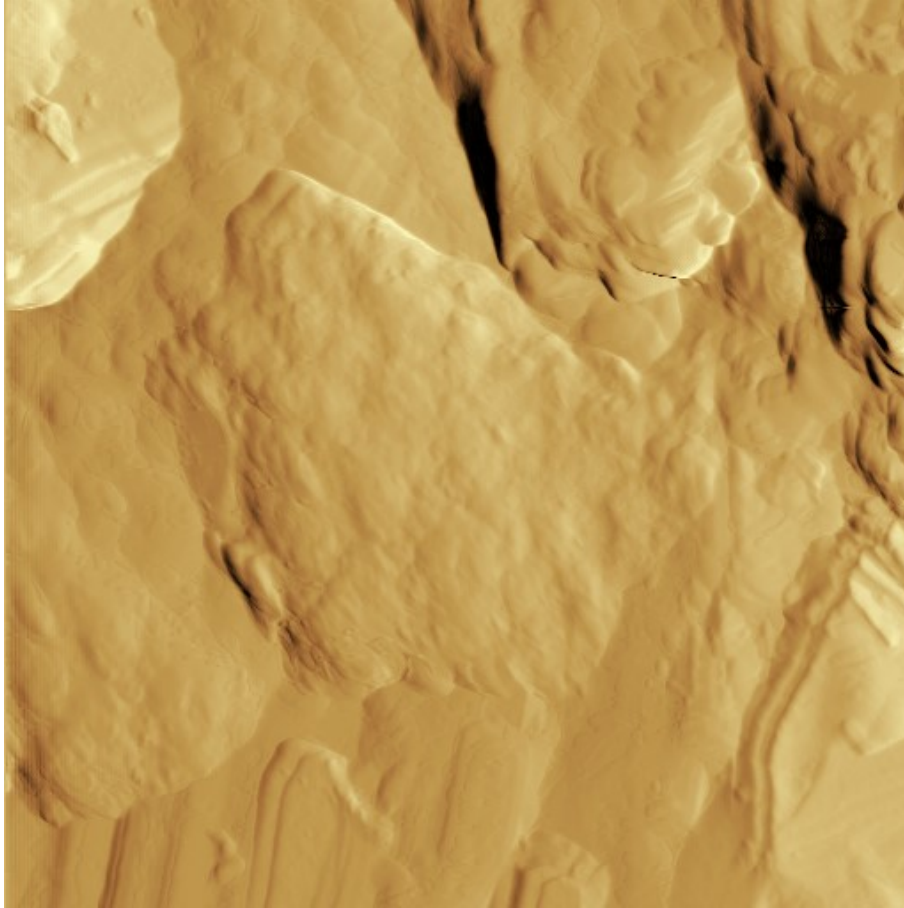

**Figure S2. Atomic force microscopy image of the CuGaO<sub>2</sub> film on GaN substrate in the scan area of 2  $\mu\text{m}$  x 2  $\mu\text{m}$ .**

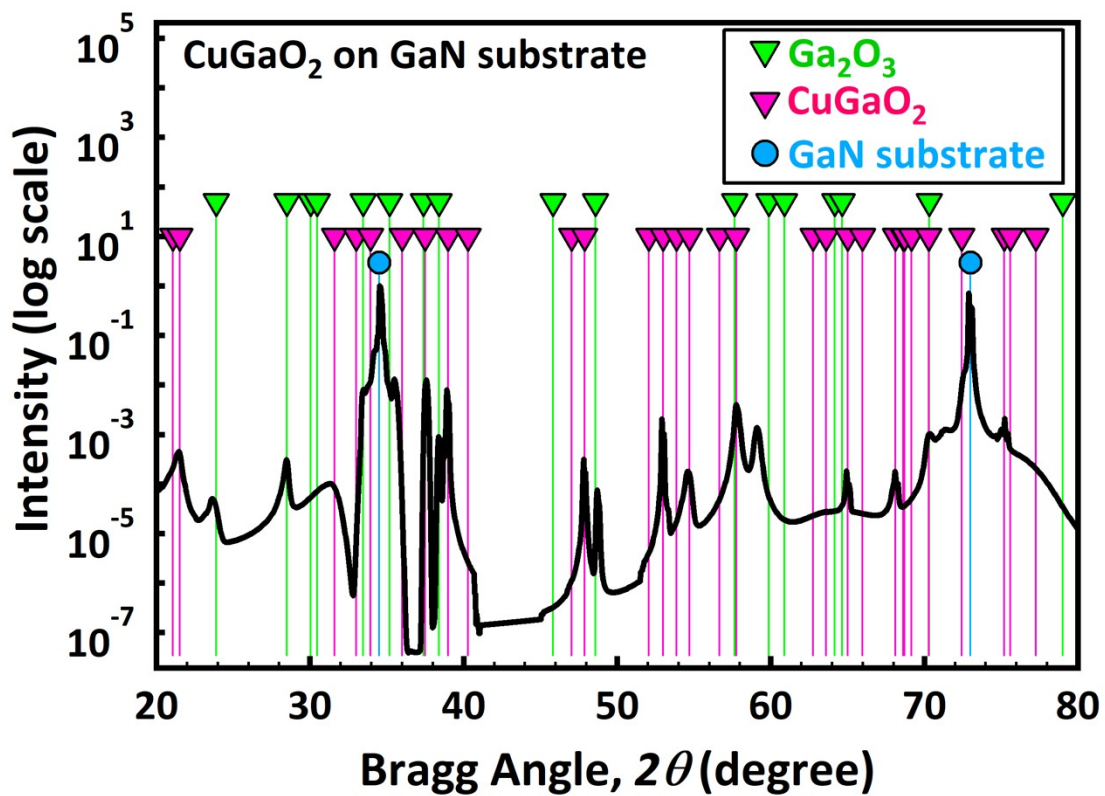

Figure S3. XRD profile of the CuGaO<sub>2</sub> film on GaN substrate. The intensity is in the log scale.

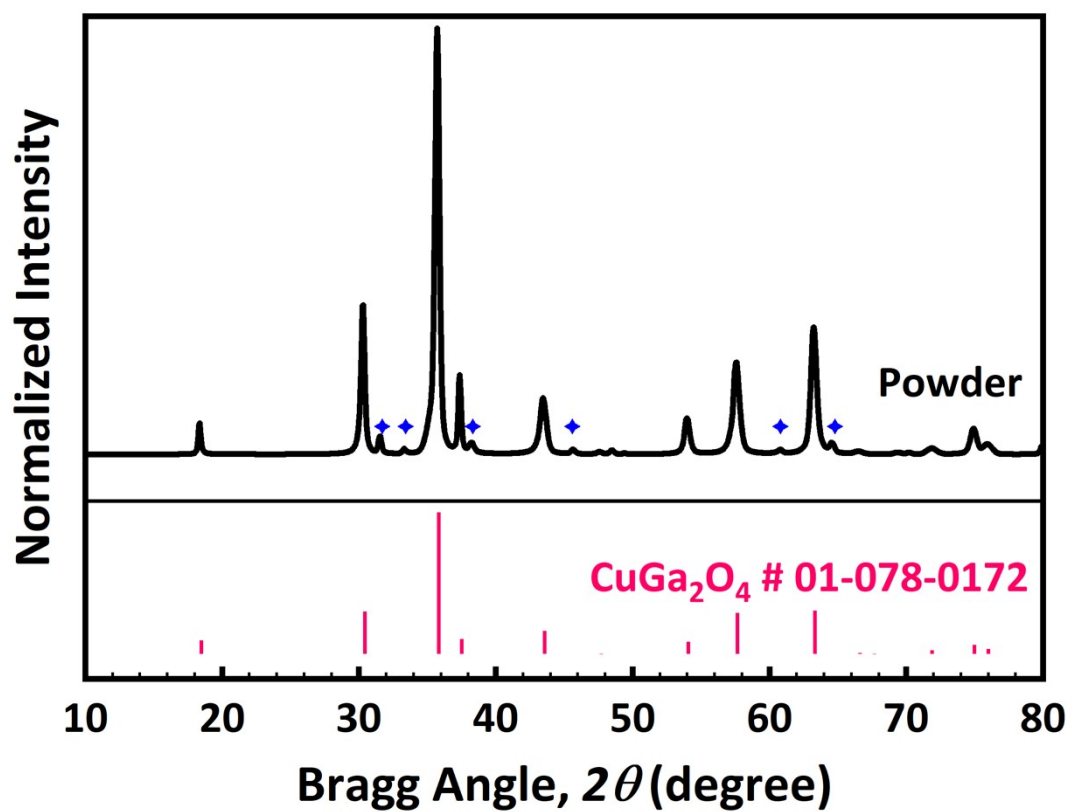

Figure S4. XRD profile of the powder synthesized inside the crucible. Star markers are related to  $\text{Ga}_2\text{O}_3$  impurities.

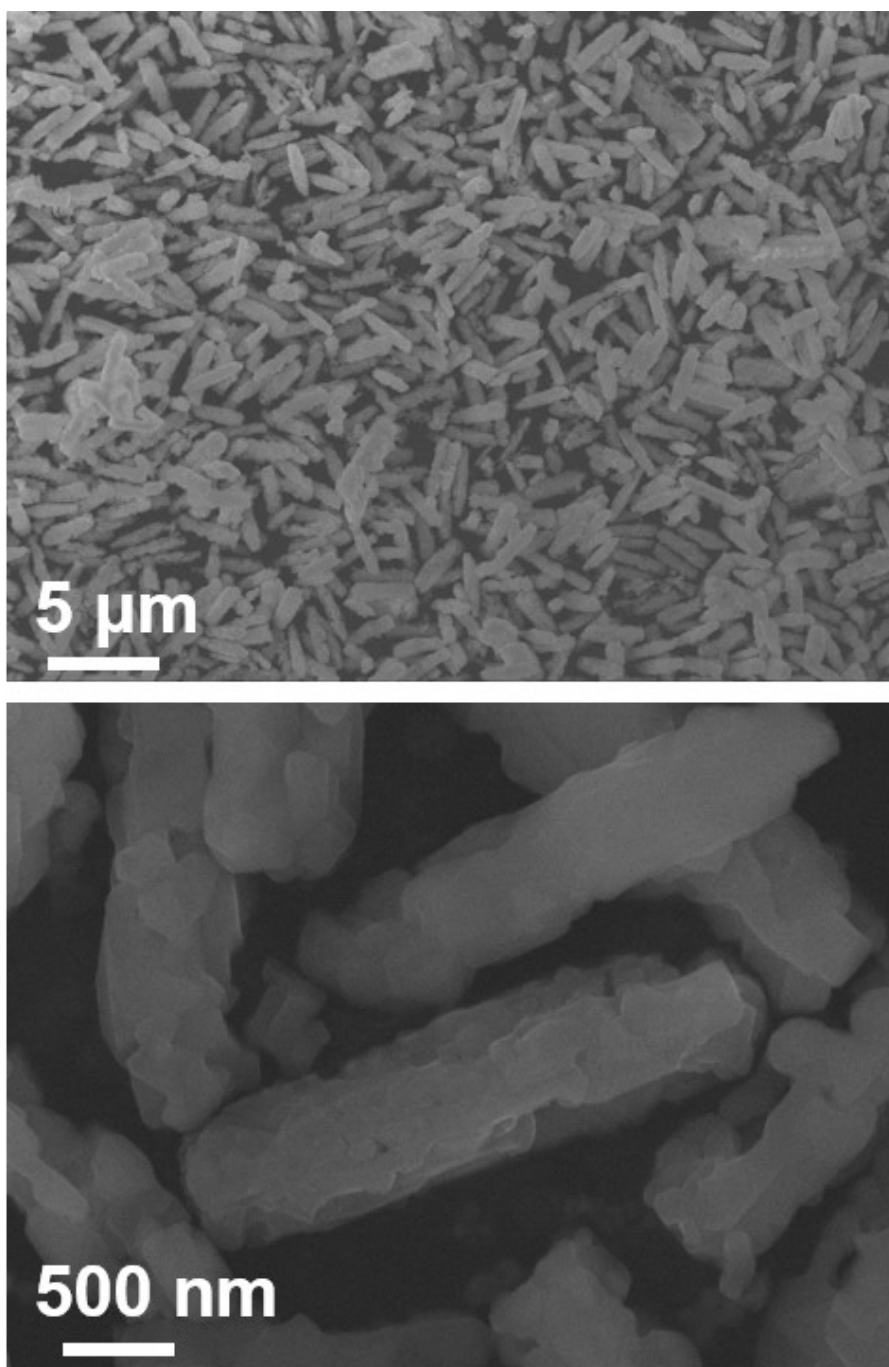

**Figure S5. SEM micrographs of the powder synthesized inside the crucible. (upper): low-magnification, (lower): high-magnification.**

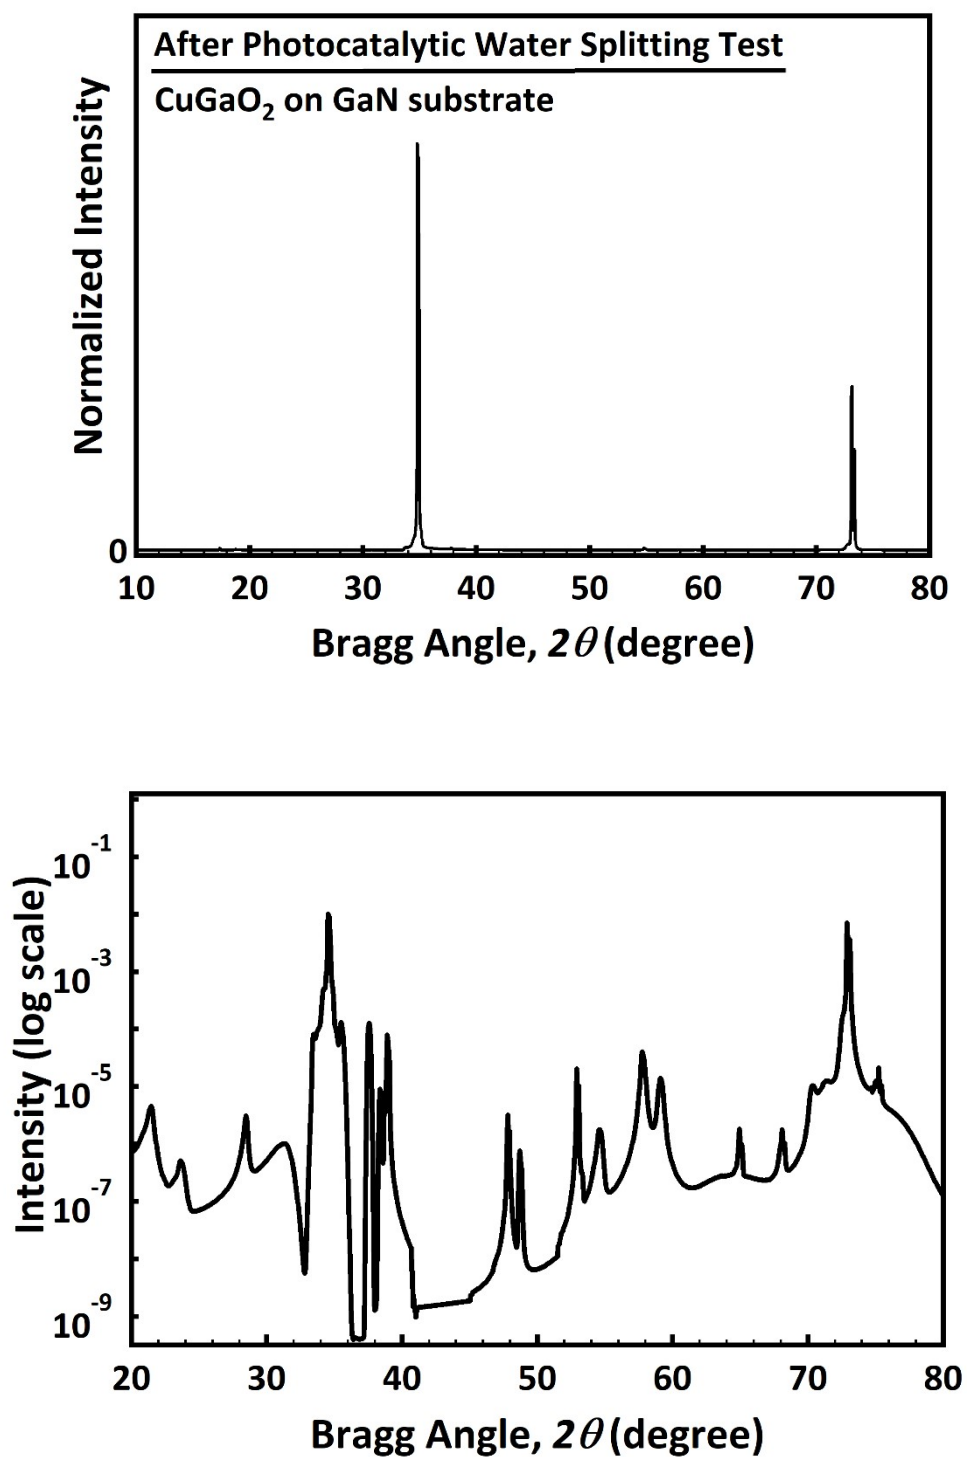

Figure S6. XRD profile of the CuGaO<sub>2</sub> film on GaN substrate after photocatalytic test for confirming the stability of the photocatalyst. (Upper): Normalized Intensity, (Lower): log scale.



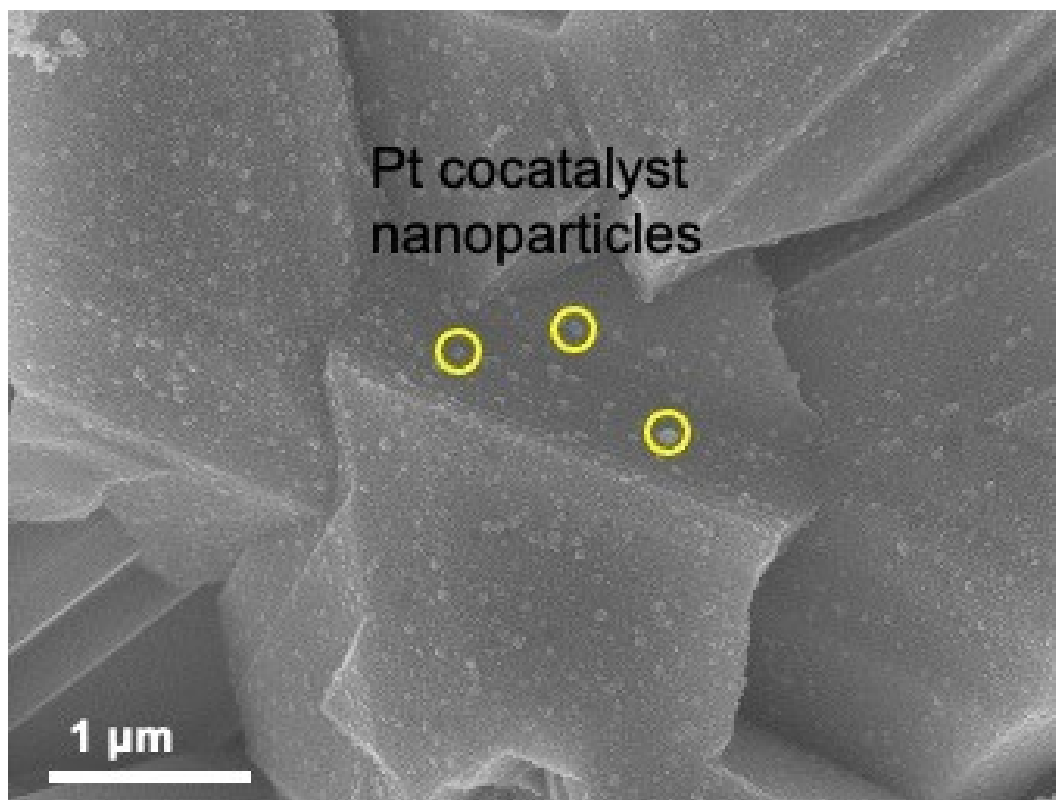

**Figure S7. SEM micrograph of Pt cocatalyst nanoparticles on the surface of CuGaO<sub>2</sub> film on GaN substrate. Some representative Pt particles are shown with yellow circles.**

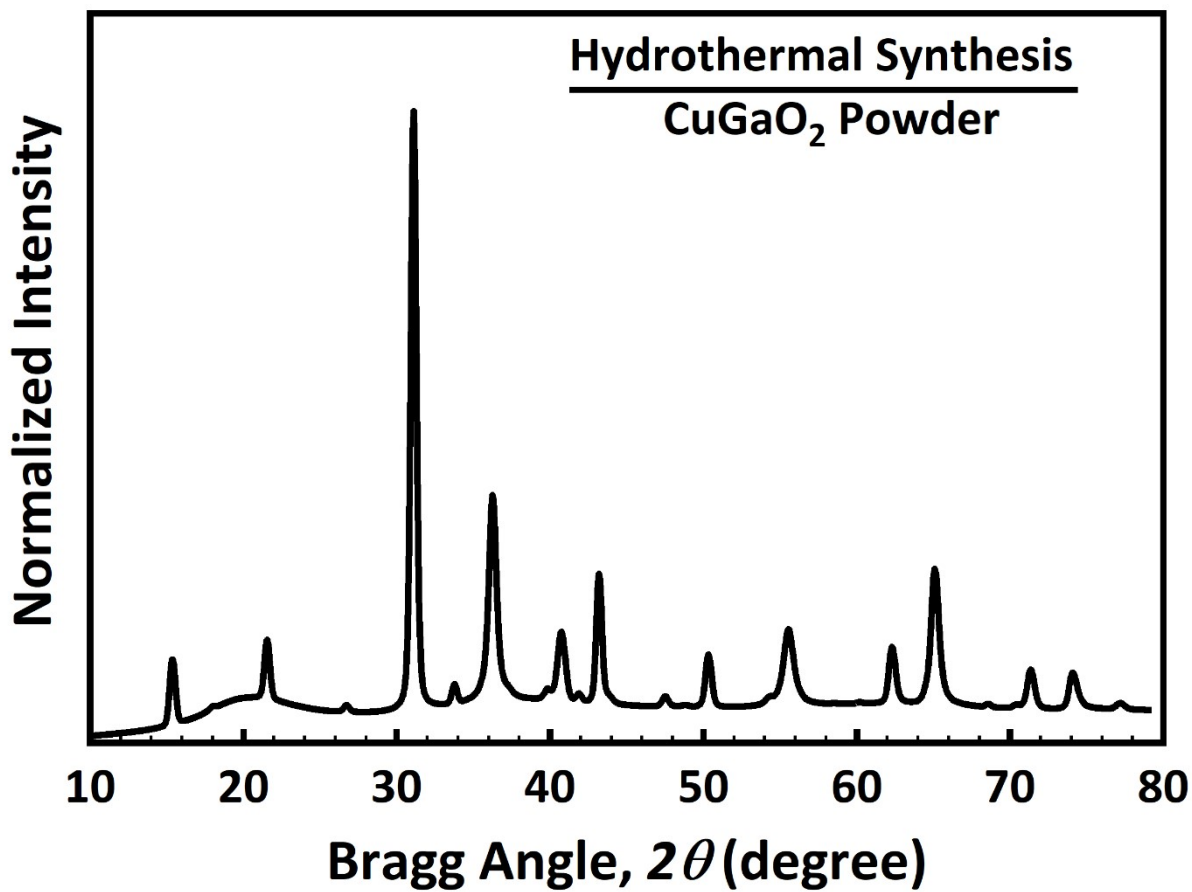

Figure S8. XRD profile of the hydrothermally synthesized CuGaO<sub>2</sub>.

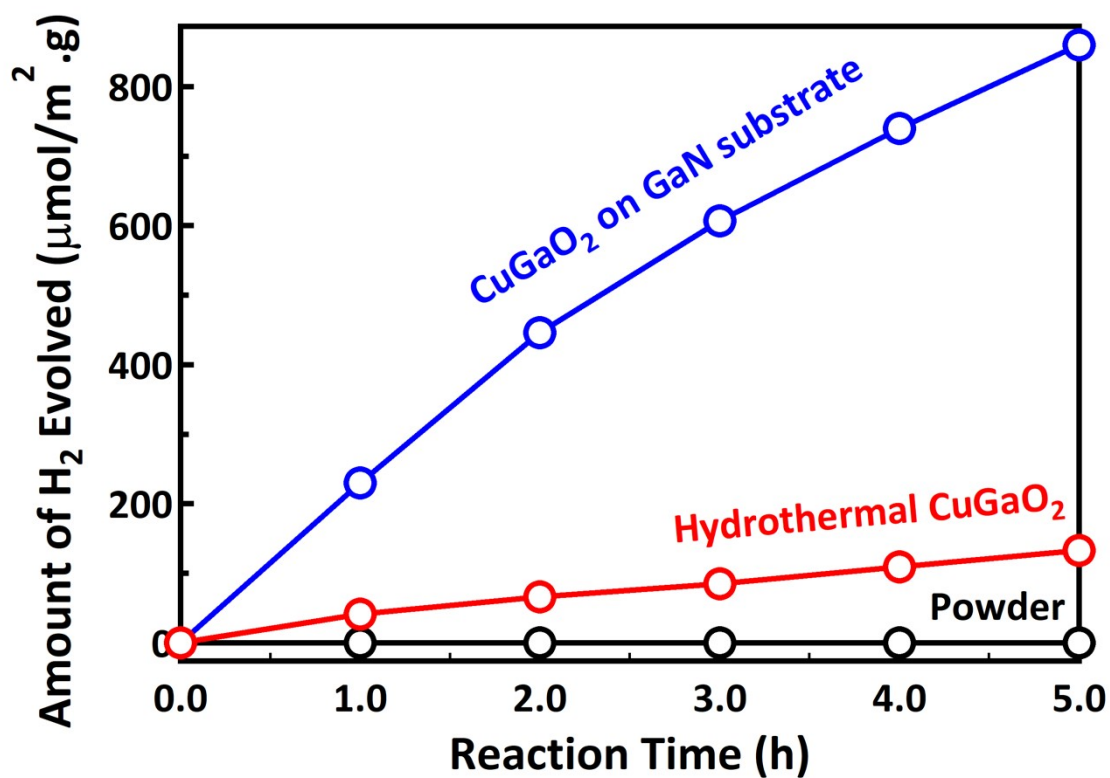

Figure S9. Photocatalytic hydrogen generation of the hydrothermally synthesized CuGaO<sub>2</sub>.

### **Experimental procedure of CuGaO<sub>2</sub> synthesized by a hydrothermal method.**

The CuGaO<sub>2</sub> was synthesized by the classical alcohol reduction method at low temperature. 5 mmol of Ga(NO<sub>3</sub>)<sub>3</sub>·xH<sub>2</sub>O and 5 mmol of Cu(NO<sub>3</sub>)<sub>2</sub>·3H<sub>2</sub>O were dissolved in 40 mL deionized water. Then, 1 M KOH water solution was slowly added to the mixture and the pH was adjusted to 7.5. After that, the hydrothermal precursor was transferred to a 150 mL container and reacted at 230°C for 3 h. After discarding the supernatant, the collected precipitates were washed with diluted ammonia (5 wt%), nitric acid solution (5 wt%) and deionized water 5 times. Finally, pure CuGaO<sub>2</sub> was obtained by washing the product with ethanol 3 times.
